# Supplementary material for: Molecular basis for multimerization in the activation of the epidermal growth factor receptor
Source: eLife journal article supplement (doi:10.7554/elife.14107), 2016-03-28
Supplement: supp [file elife-14107-supp-v1.zip]

Figure 11,  
Supplemental Figure 1

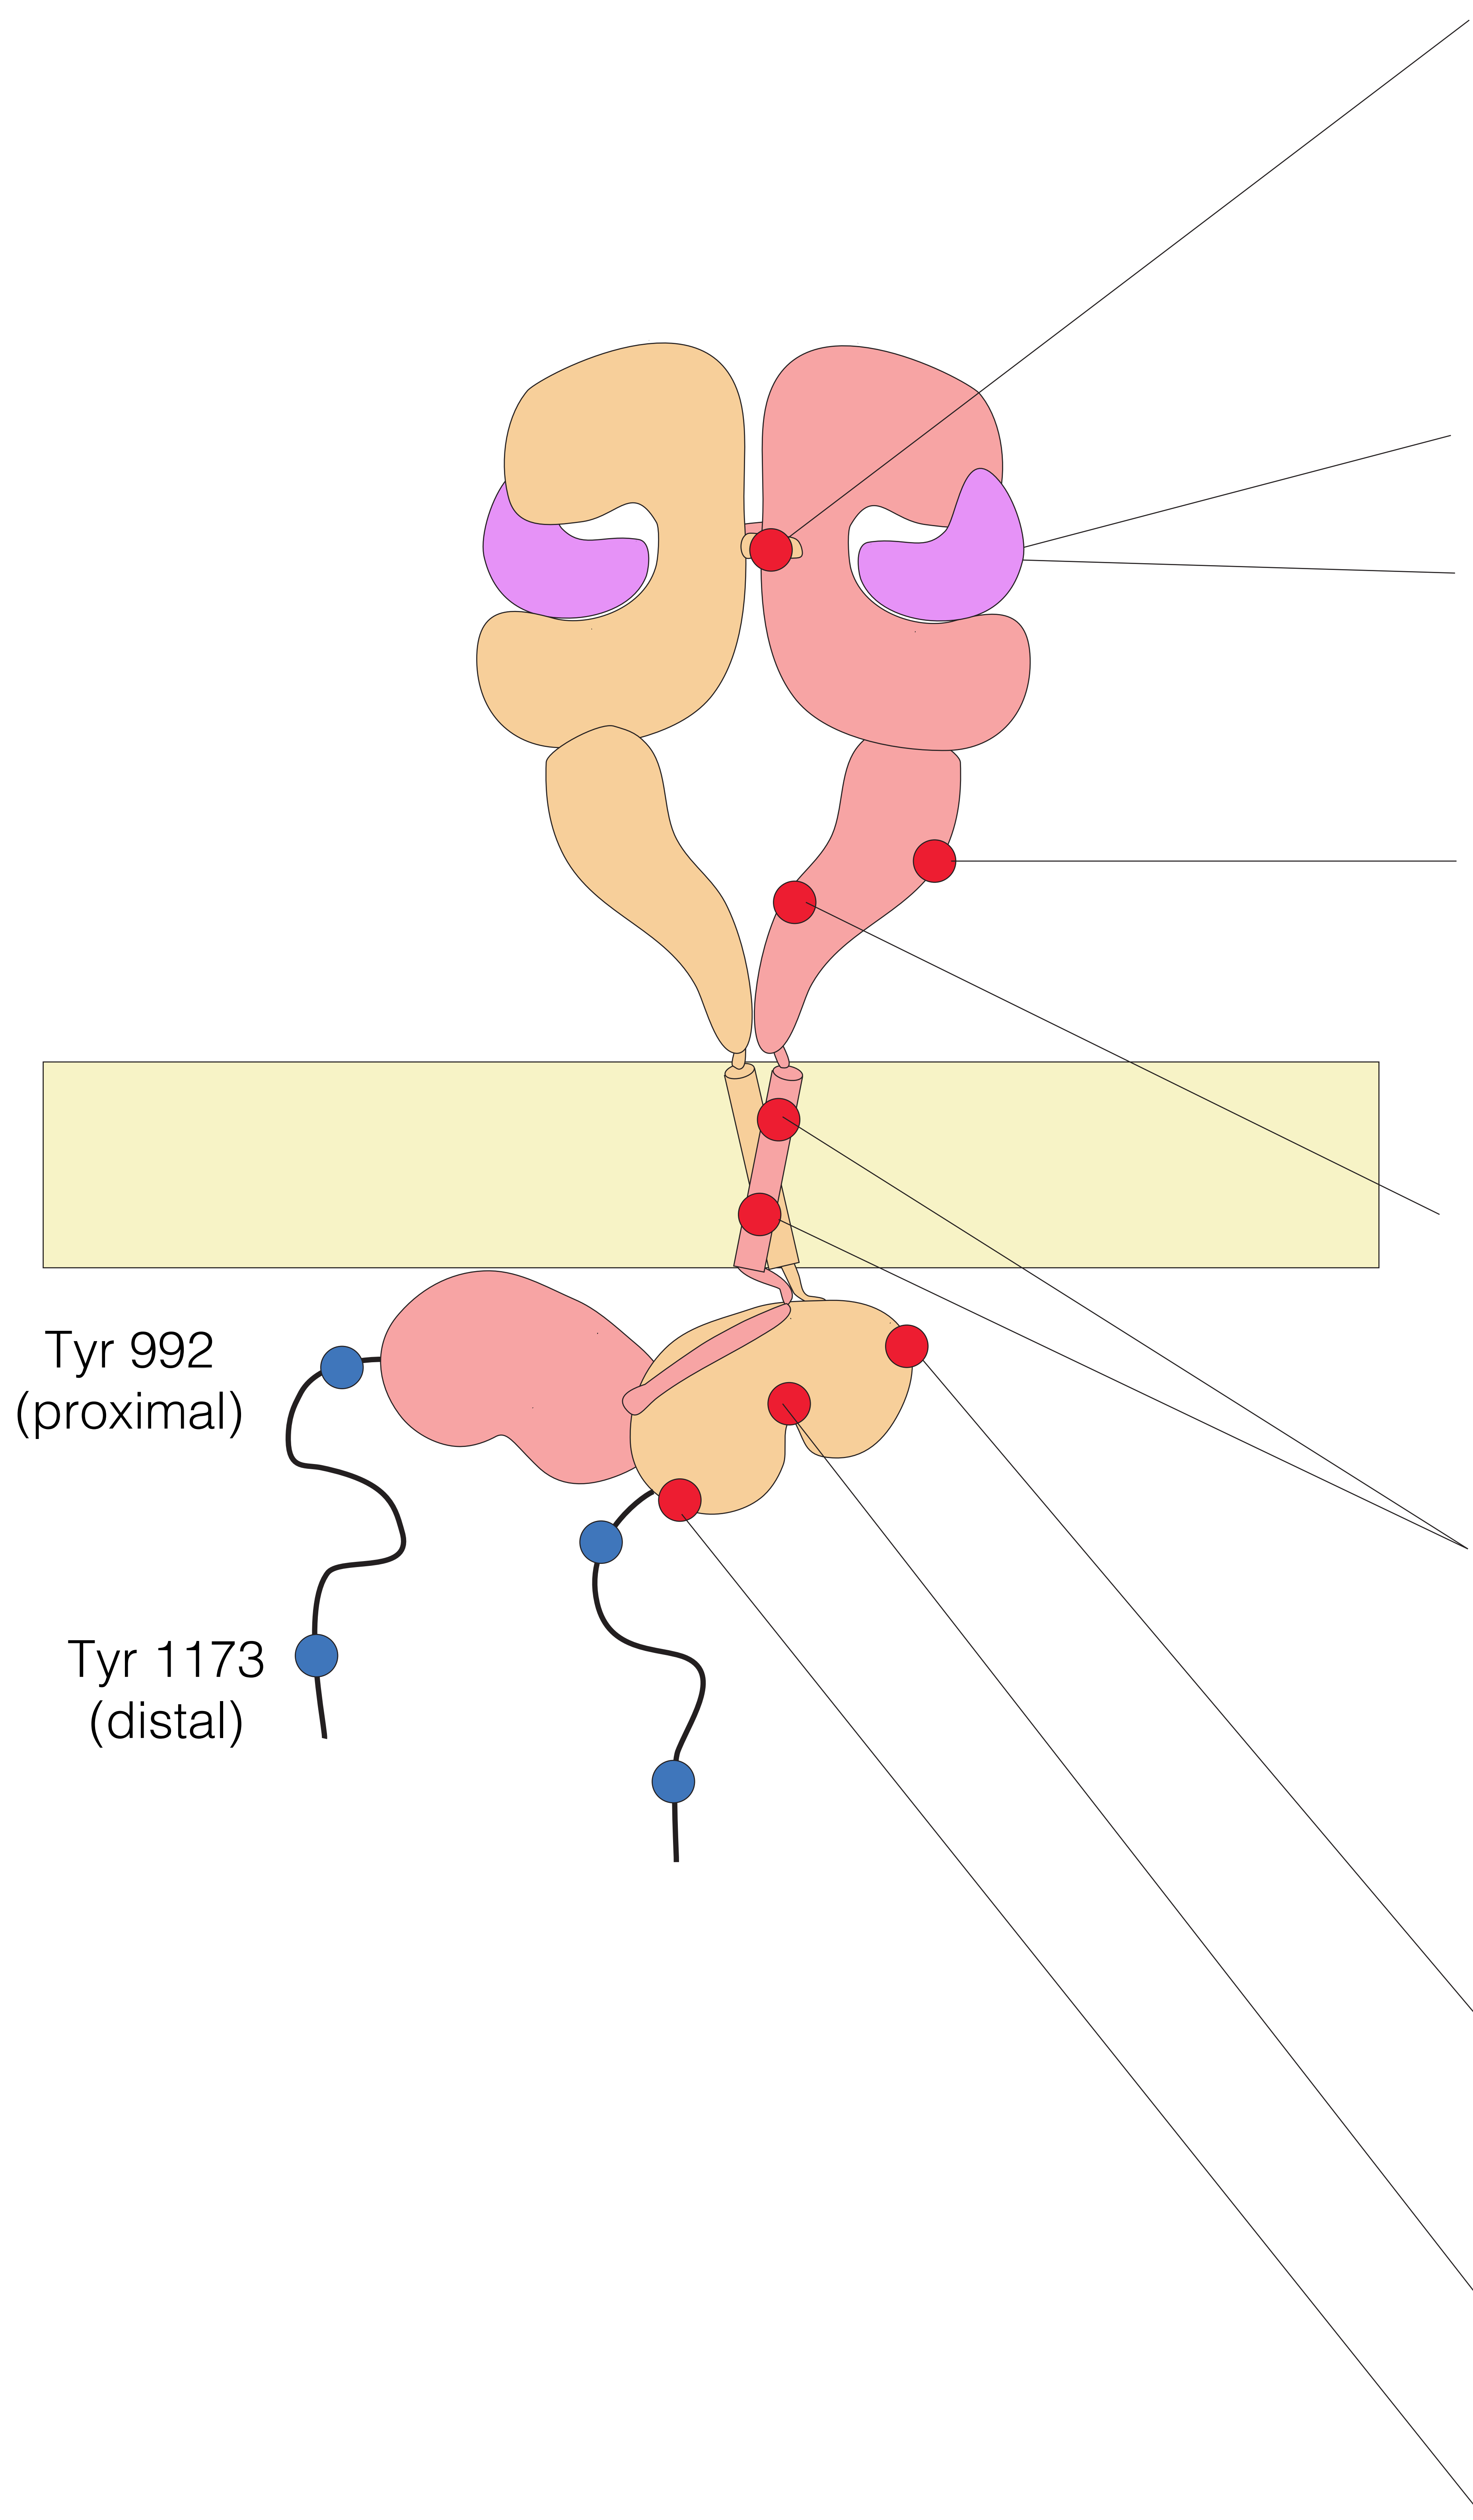

| Mutation or Variation                                                                                            | Effect on Activity                                              | Effect on Multimerization                                                                       |
|------------------------------------------------------------------------------------------------------------------|-----------------------------------------------------------------|-------------------------------------------------------------------------------------------------|
| deletion of dimerization arm:<br>Δ-arm                                                                           | strong reduction of autophosphorylation in Tyr 992 and Tyr 1173 | increases EGF-independent dimerization but has little effect on EGF-induced multimerization     |
| replacement of EGF by TGF-α                                                                                      |                                                                 | modest effect on EGF-induced dimerization                                                       |
| EGF concentration increased from 15 nM to 2 μM                                                                   |                                                                 | no reduction in EGF-induced multimerization                                                     |
| mutations in the proposed Domain IV multimerization interface:<br>IIIV/KKRE<br>VEN/ERR<br>TN/RR                  | reduction in Tyr 992 and Tyr 1173 phosphorylation               | decreases EGF-dependent multimerization                                                         |
|                                                                                                                  | strong reduction of PI3K phosphorylation                        | no reduction in EGF-induced dimerization                                                        |
|                                                                                                                  | no effect on ERK phosphorylation                                |                                                                                                 |
| mutation of the autoinhibitory tether on Domain IV:<br>Δ-tether                                                  |                                                                 | increases EGF-independent dimerization                                                          |
| mutations in the transmembrane helix (small residues in the N- and C-terminal interfaces replaced by isoleucine) | modest effect on Tyr 1173<br>stronger effect on Tyr 992         | strong reduction of EGF-dependent multimerization                                               |
|                                                                                                                  | strong reduction of PI3K phosphorylation                        | no reduction in EGF-induced dimerization                                                        |
|                                                                                                                  | no effect on ERK phosphorylation                                |                                                                                                 |
| receiver-impaired (I682Q)                                                                                        | tail can only be phosphorylated within an asymmetric dimer      | reduces EGF-dependent multimerization and EGF-independent dimerization when combined with V924R |
| kinase-dead (D813N)                                                                                              | tail can be phosphorylated only within an asymmetric dimer      | no effect on EGF-dependent multimerization                                                      |
| activator-impaired (V924R)                                                                                       |                                                                 | reduces EGF-dependent multimerization and EGF-independent dimerization when combined with I682Q |
