# Supplementary material for: Molecular basis for multimerization in the activation of the epidermal growth factor receptor
Source: eLife journal article supplement (doi:10.7554/elife.14107), 2016-03-28
Supplement: supp [file elife-14107-supp-v1.zip]

Figure 11,  
Supplemental Figure 3

coarse-grained  
representation  
of initial model

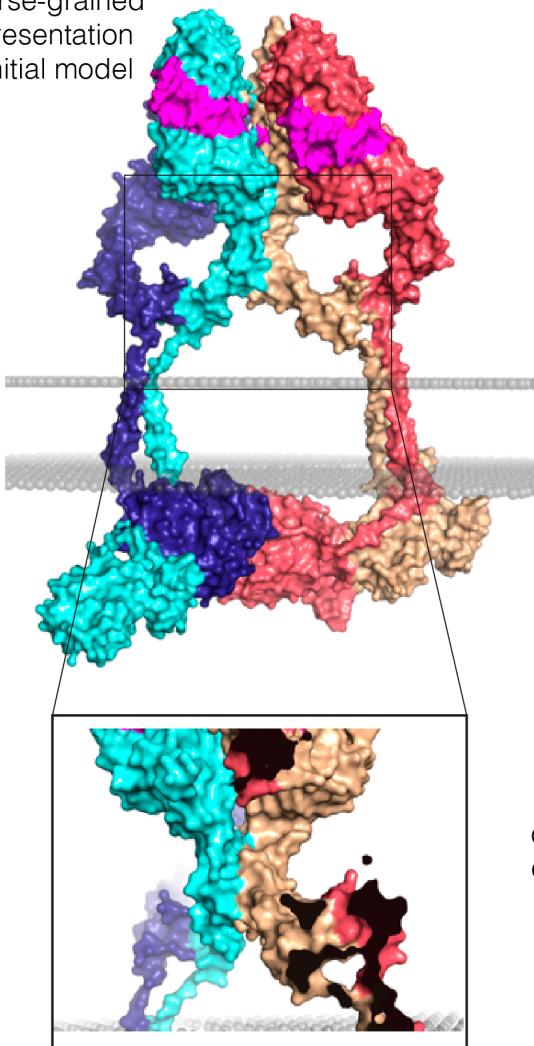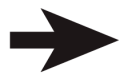

structure after  
 $\sim 1 \mu\text{s}$   
simulation

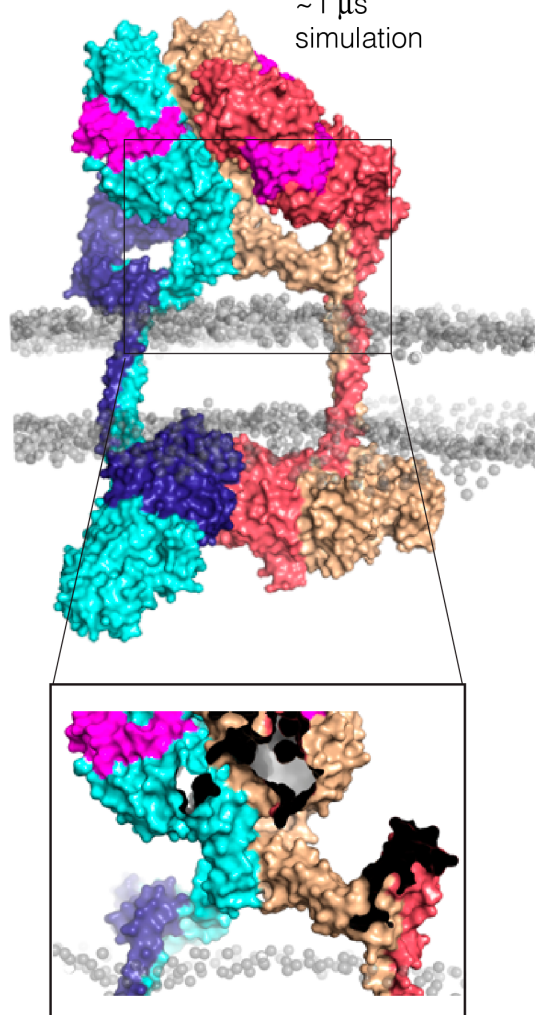

expanded,  
rotated and  
clipped view  
of domain IV  
interface
