# Supplementary material for: Molecular basis for multimerization in the activation of the epidermal growth factor receptor
Source: eLife journal article supplement (doi:10.7554/elife.14107), 2016-03-28
Supplement: supp [file elife-14107-supp-v1.zip]

Archive with 8 entries (8 files):
- elife_poa_e14107_Figure_8_figure_supplement_2.pdf
- elife_poa_e14107_Figure_11_figure_supplement_2.pdf
- elife_poa_e14107_Figure_5_figure_supplement_1.pdf
- elife_poa_e14107_Figure_11_figure_supplement_4.pdf
- elife_poa_e14107_Figure_11_figure_supplement_3.pdf
- elife_poa_e14107_Figure_8_figure_supplement_1.pdf
- elife_poa_e14107_Figure_7_figure_supplement_1.pdf
- elife_poa_e14107_Figure_11_figure_supplement_1.pdf
