# Supplementary figures and images for: Molecular basis for multimerization in the activation of the epidermal growth factor receptor
Source: eLife journal article supplement (doi:10.7554/elife.14107), 2016-03-28

Figure 11, Supplemental Figure 2

EGFR

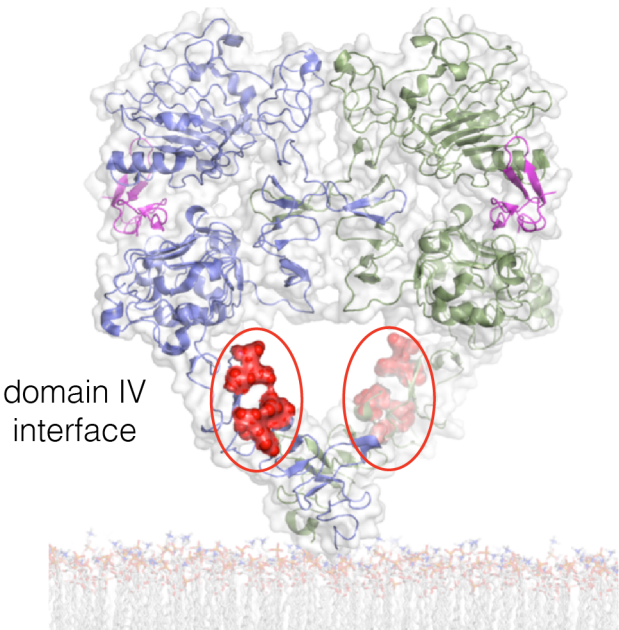

HER4

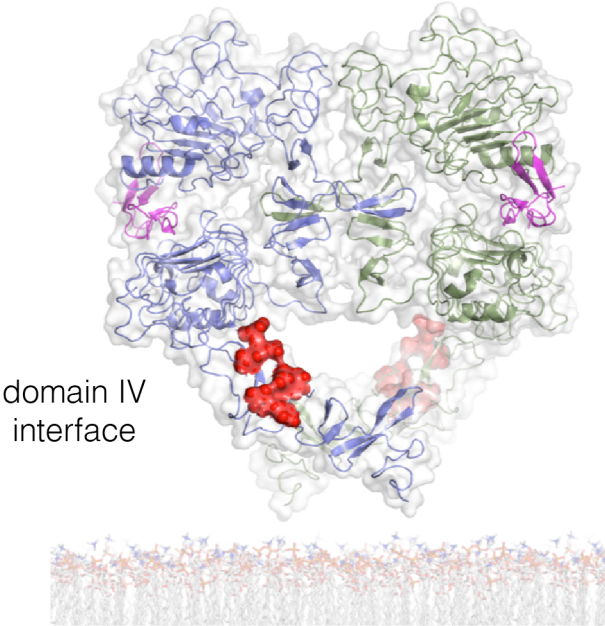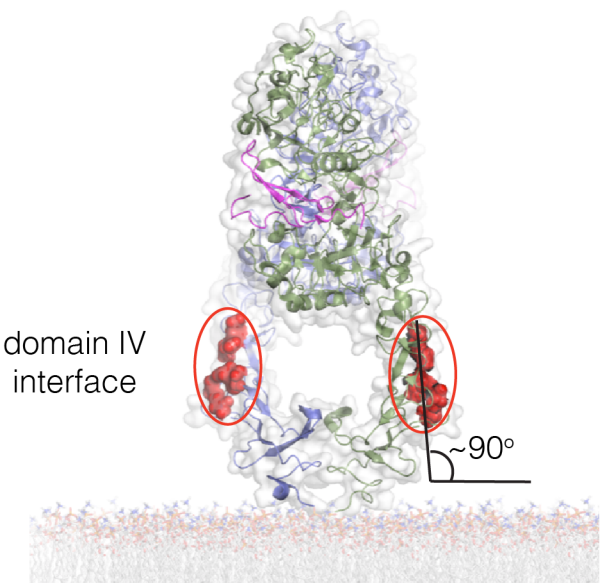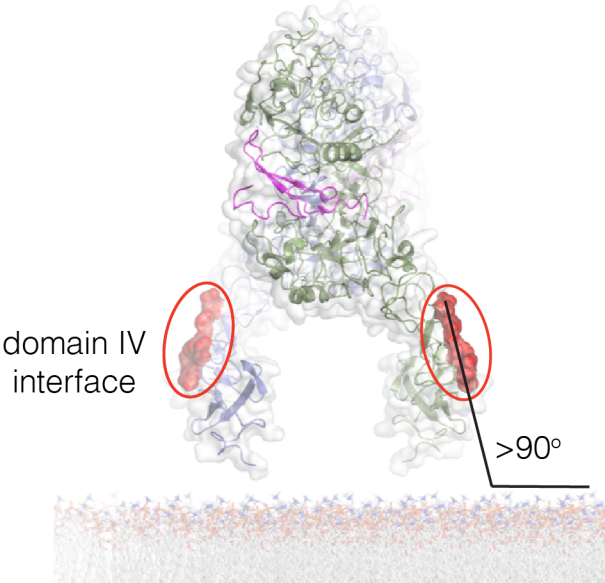

Supplement: supp [file elife-14107-supp-v1.zip]

Figure 8,  
Supplemental Figure 1

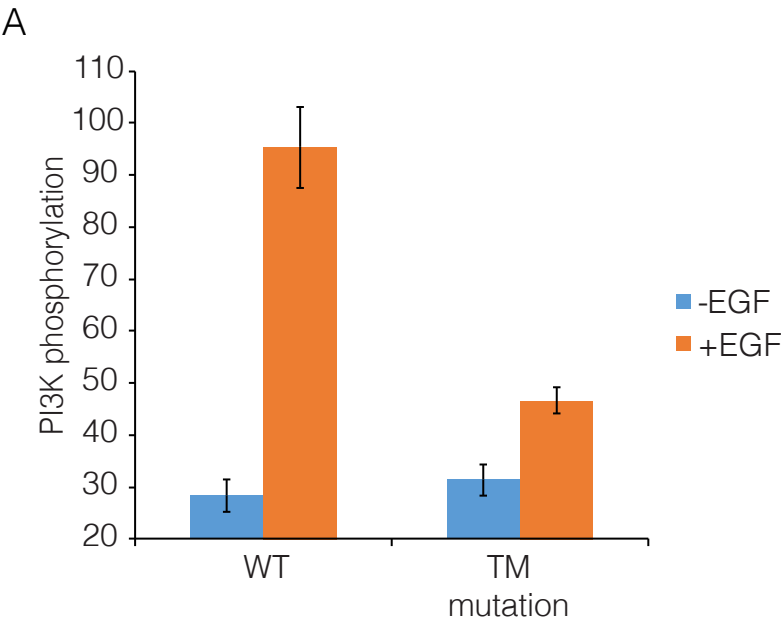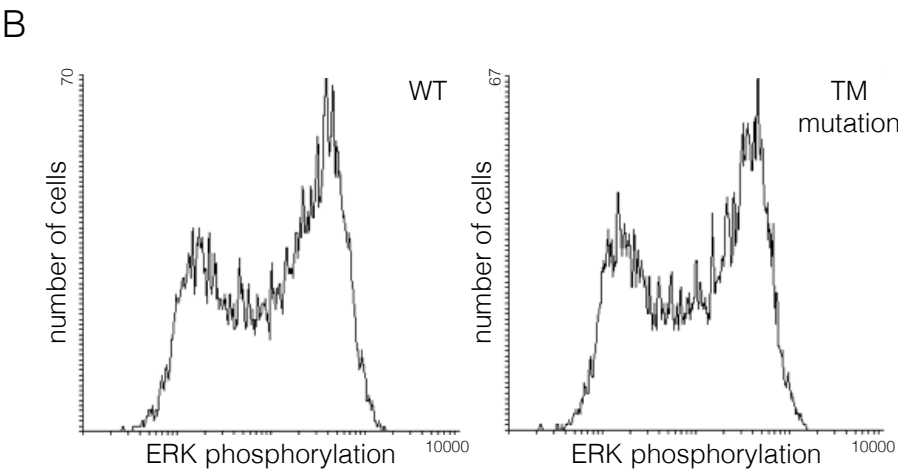

Supplement: supp [file elife-14107-supp-v1.zip]

Figure 11,  
Supplemental Figure 4

A

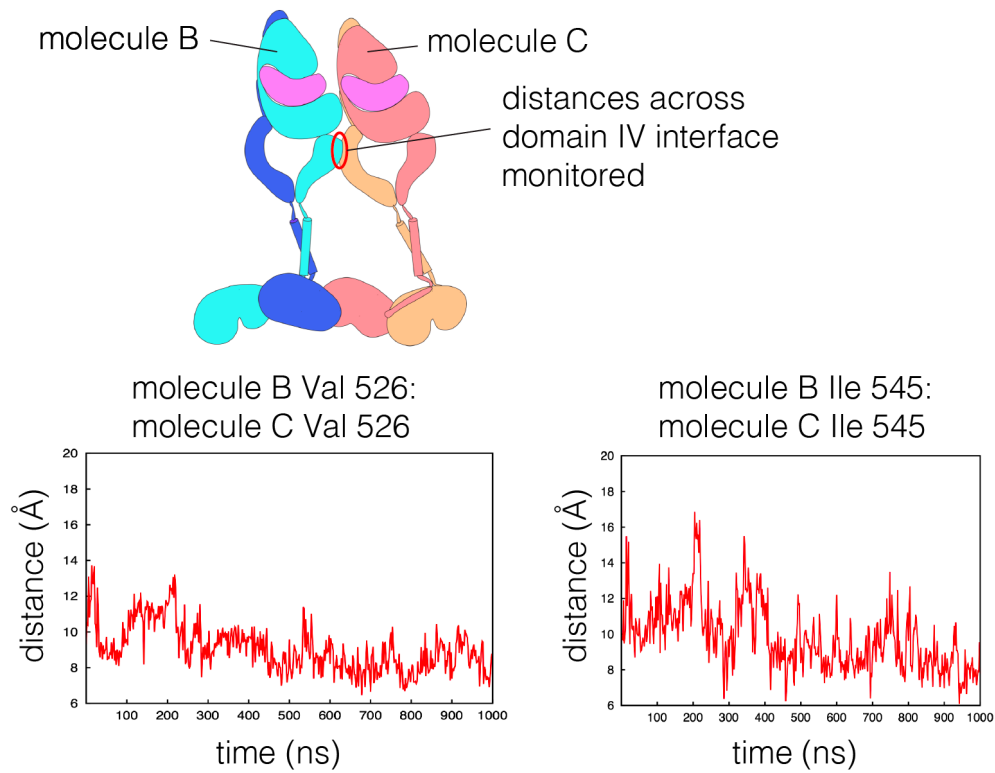

B

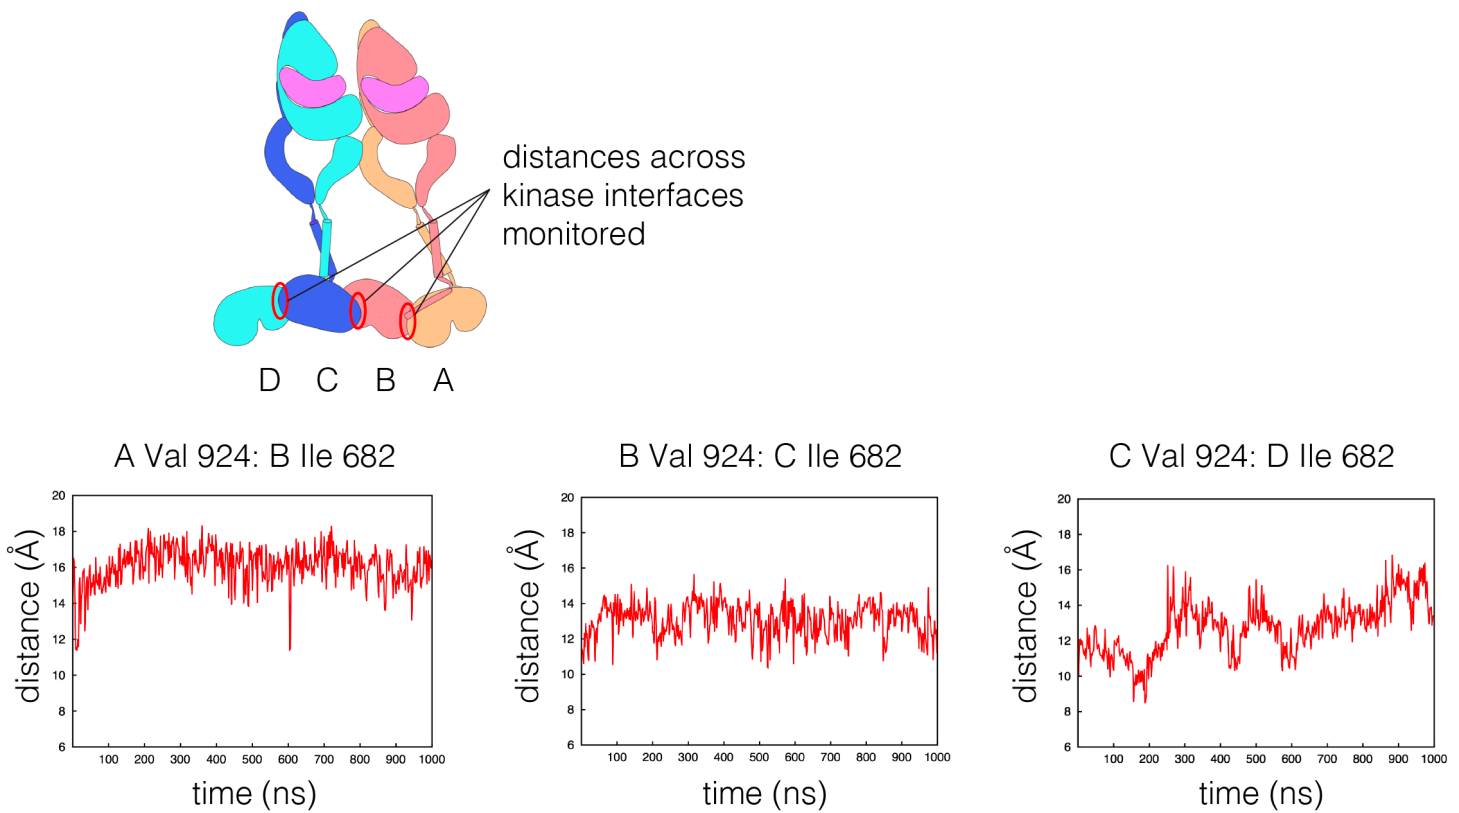

Supplement: supp [file elife-14107-supp-v1.zip]

Figure 8,  
Supplemental Figure 2

A

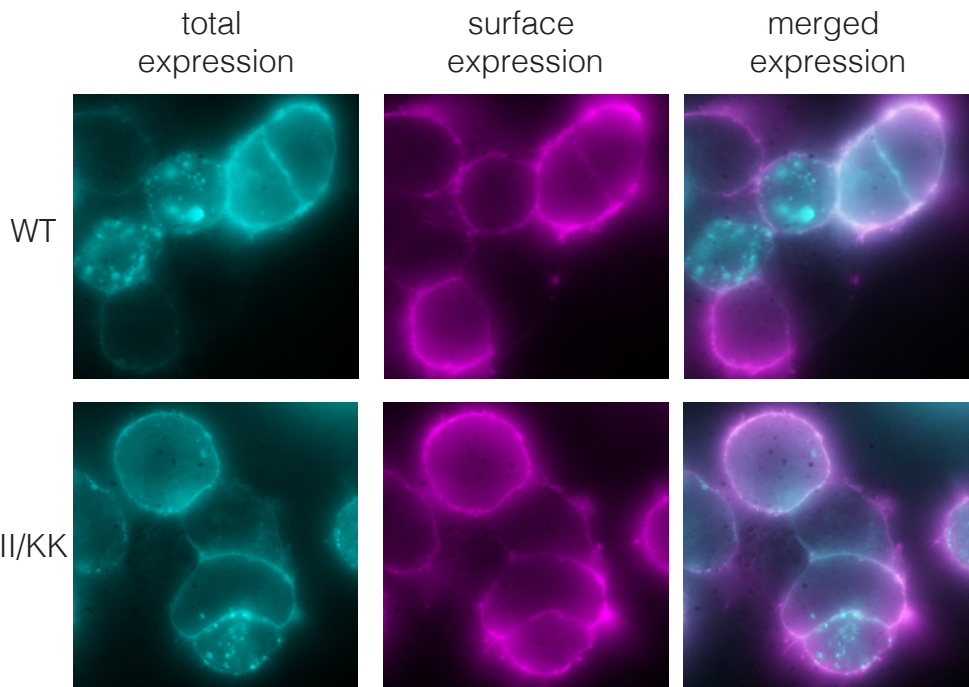

B

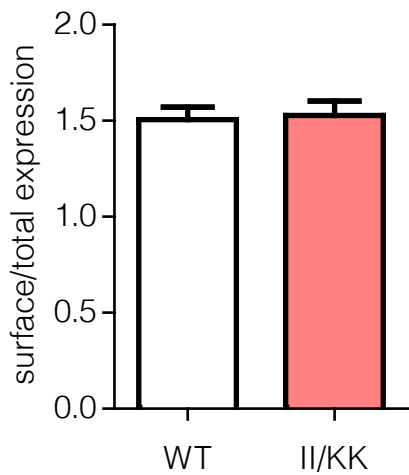

C

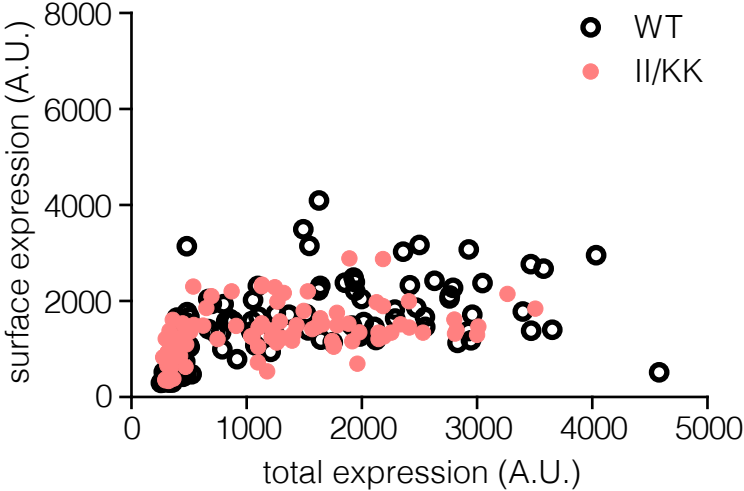

Supplement: supp [file elife-14107-supp-v1.zip]

Figure 5,  
Supplemental Figure 1

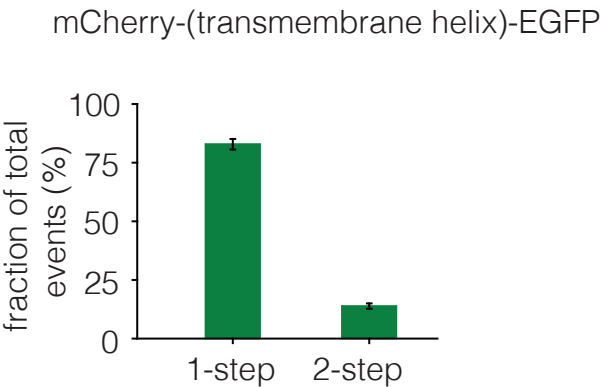

Supplement: supp [file elife-14107-supp-v1.zip]

Figure 7,  
Supplemental Figure 1

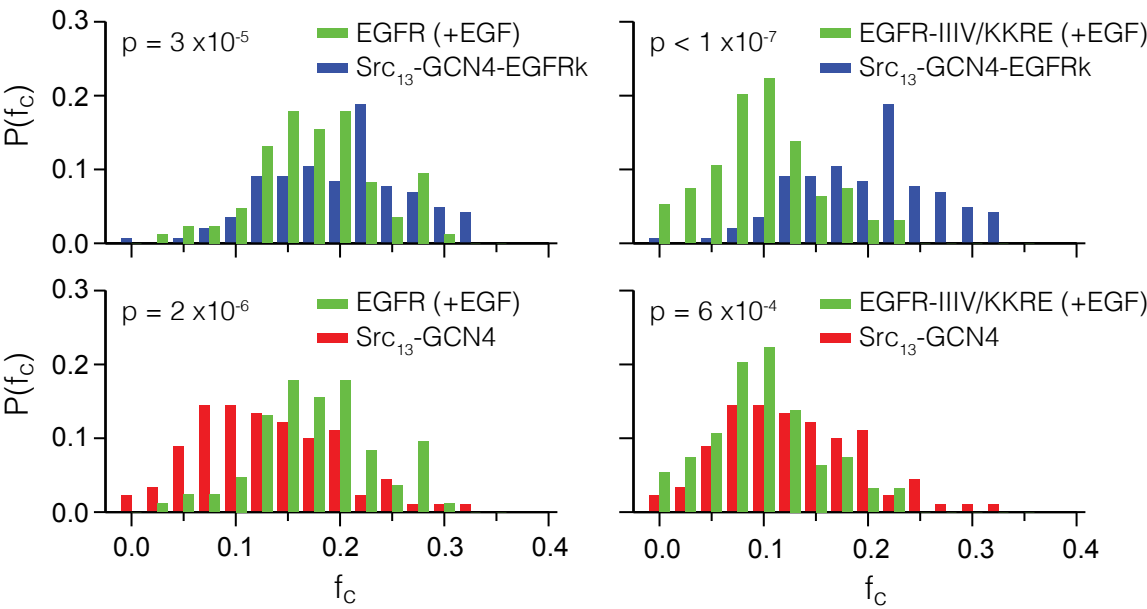

Supplement: supp [file elife-14107-supp-v1.zip]
